# Supplementary material for: Hybrid zinc oxide/graphene electrodes for depleted heterojunction colloidal quantum-dot solar cells
Source: Royal Society of Chemistry journal article supplement (doi:10.1039/c5cp03571f), 2015-01-01
Supplement: c5cp03571f1.pdf [file c5cp03571f1.pdf]

## **Supporting information**

### **Hybrid zinc oxide/graphene electrodes for depleted heterojunction colloidal quantum-dot solar cells**

Mohammad Mahdi Tavakoli<sup>a,b</sup>, Hossein Aashuri<sup>a</sup>, Abdolreza Simchi<sup>a,c\*</sup>, Zhiyong Fan<sup>b</sup>

<sup>a</sup>Department of Materials Science and Engineering, Sharif University of Technology, 14588  
Tehran, Iran

<sup>b</sup>Department of Electronic and Computer Engineering, Hong Kong University of Science and  
Technology, Clear Water Bay, Kowloon, Hong Kong

<sup>c</sup>Institute for Nanoscience and Nanotechnology, Sharif University of Technology, 14588 Tehran,  
Iran

\*Corresponding authors. Tel: +98 (21) 6616 5261, Fax: +98 (21) 6600 5717, Email:  
simchi@sharif.edu (A. Simchi)

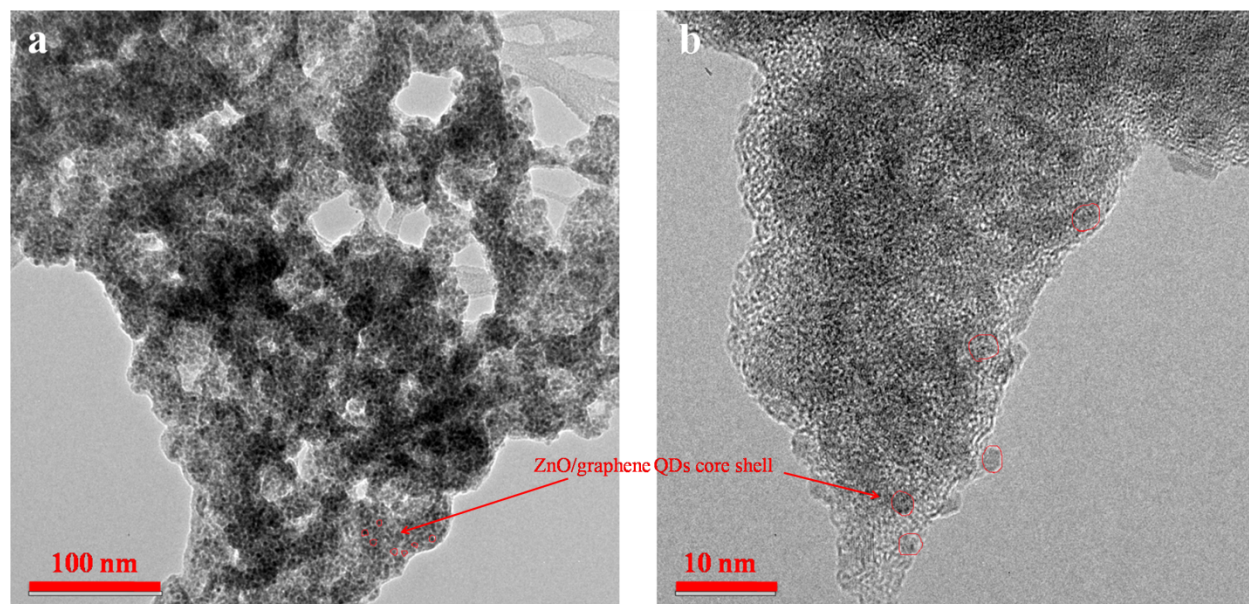

**Figure S1** TEM images of hybrid ZnO/G QDs at two different magnifications.

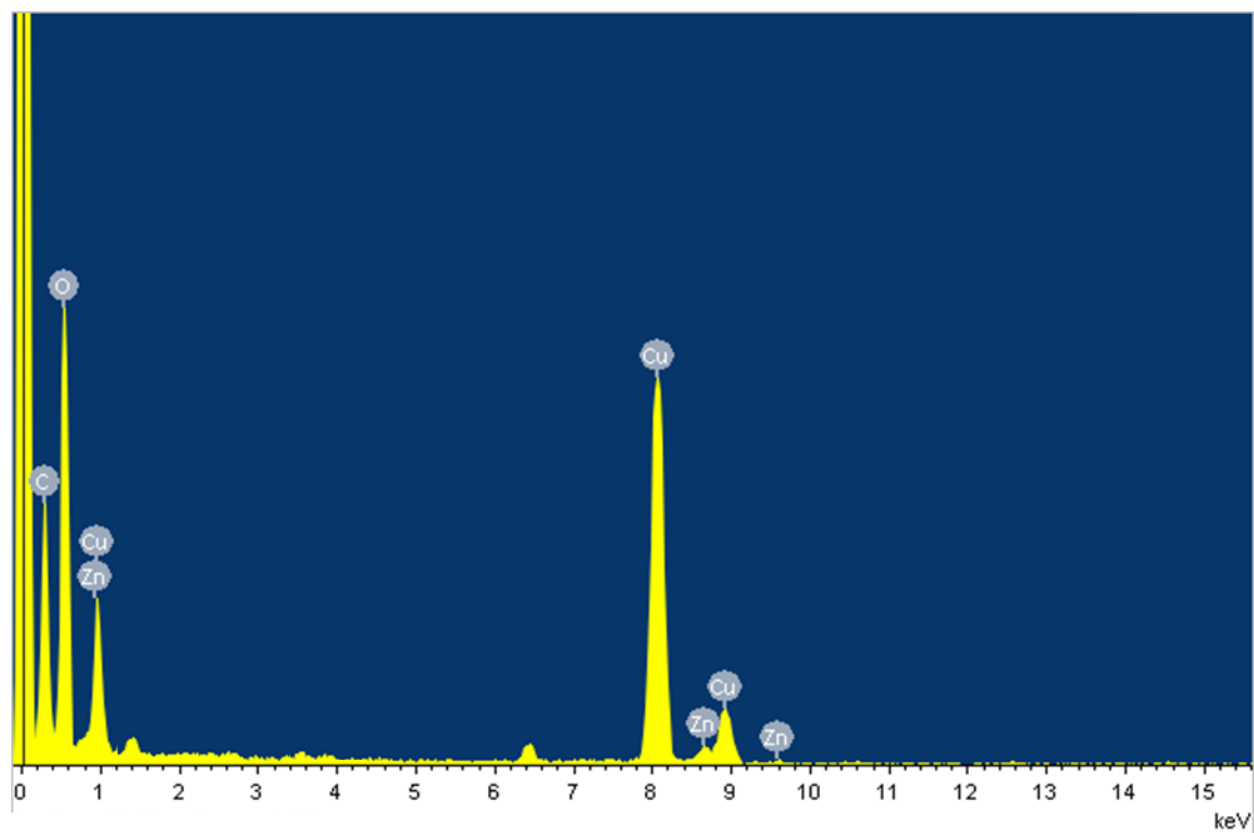

**Figure S2** EDS analysis of (a) ZnO/G QDs under HRTEM. The characteristic peaks of Cu come from the utilized copper grids.

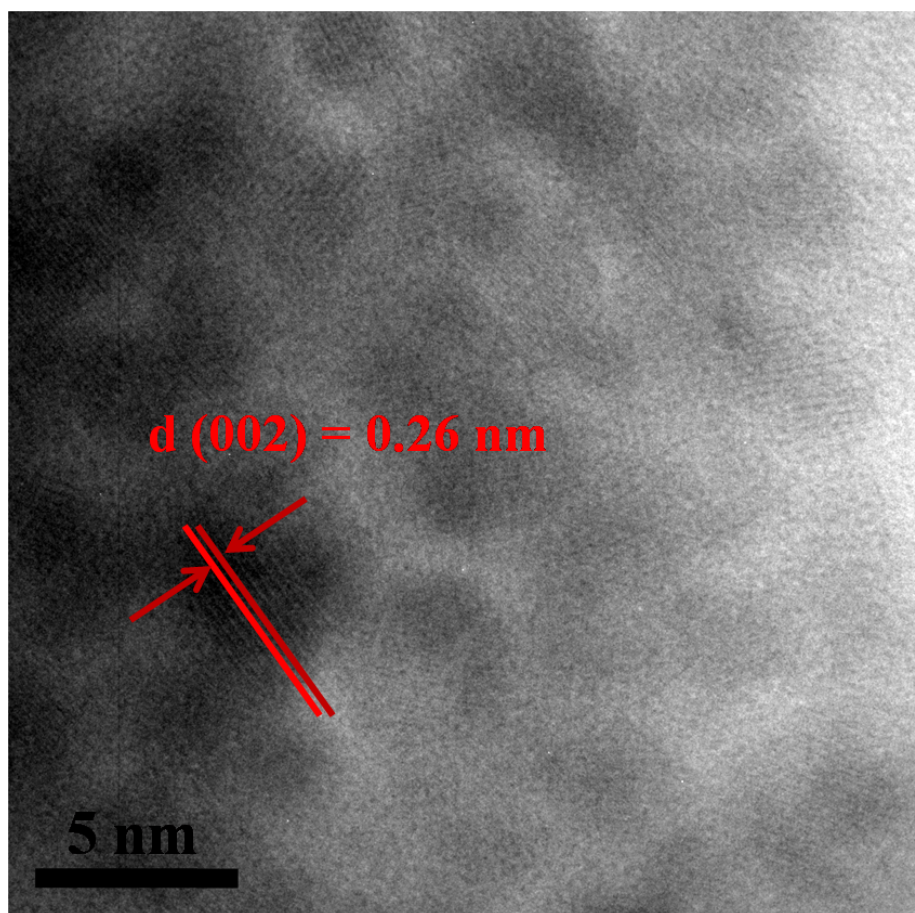

**Figure S3:** HRTEM image of ZnO QDs with an average size of 4 nm.

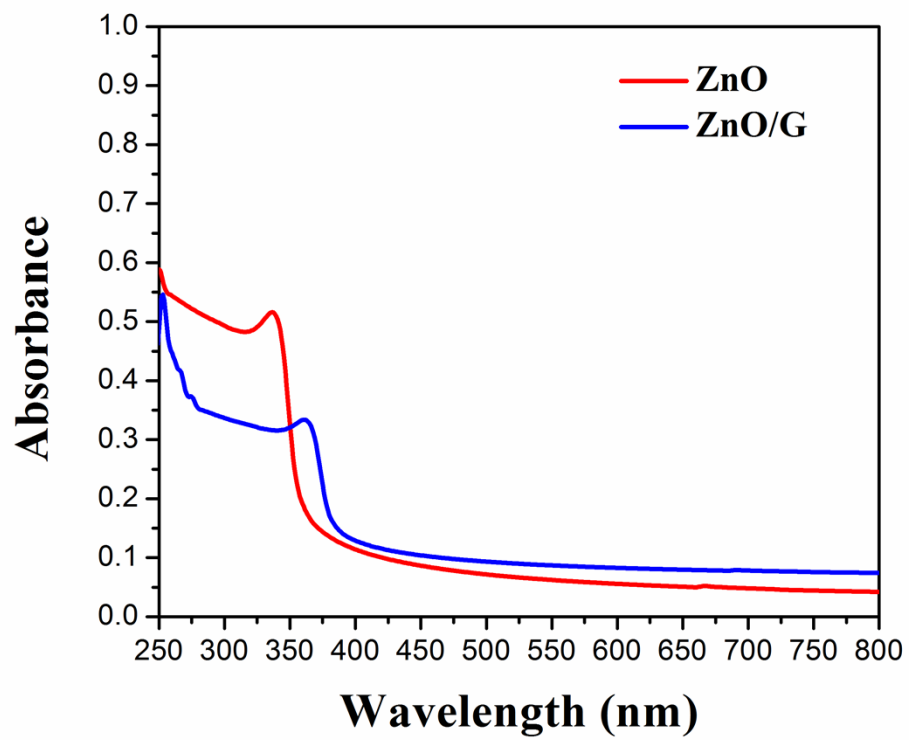

**Figure S4** The absorbance spectra of ZnO and ZnO/G QDs.

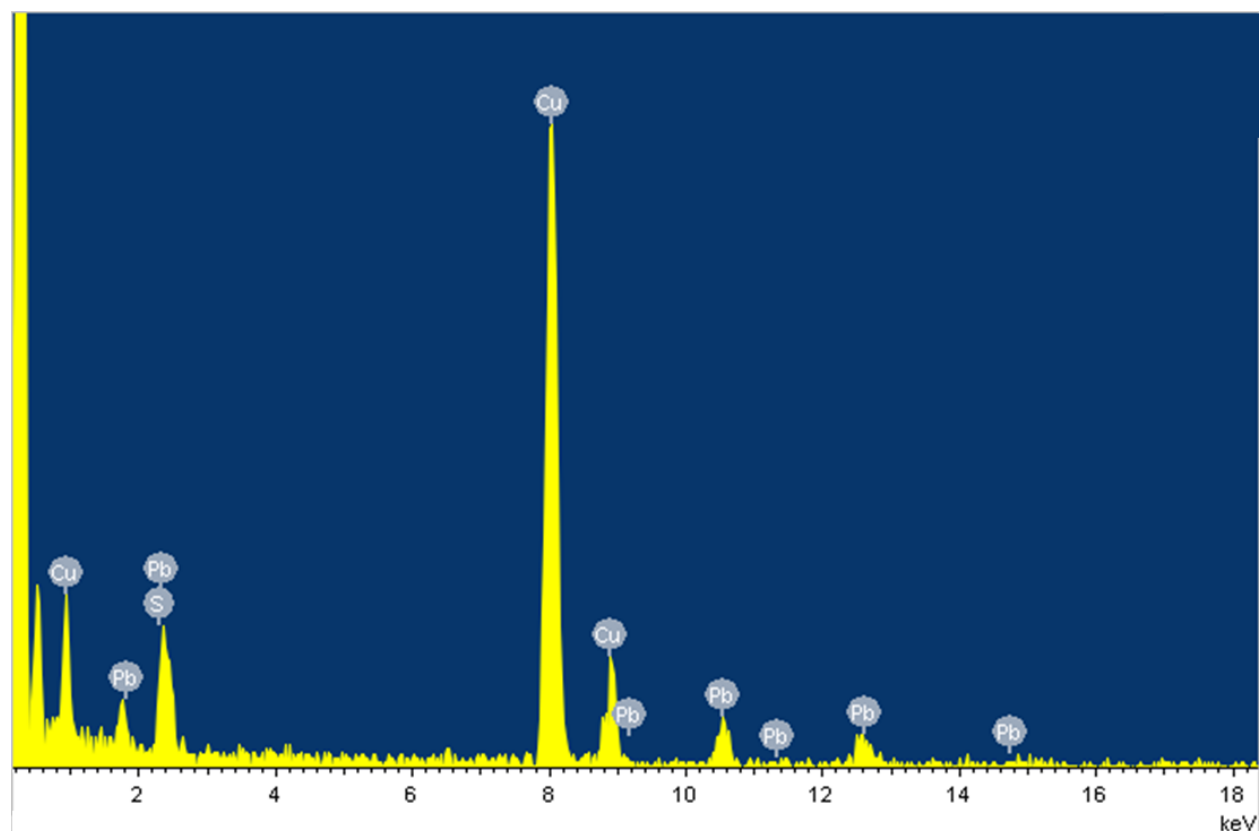

**Figure S5** EDS analysis of PbS QDs under HRTEM. The characteristic peaks of Cu come from the utilized copper grids.

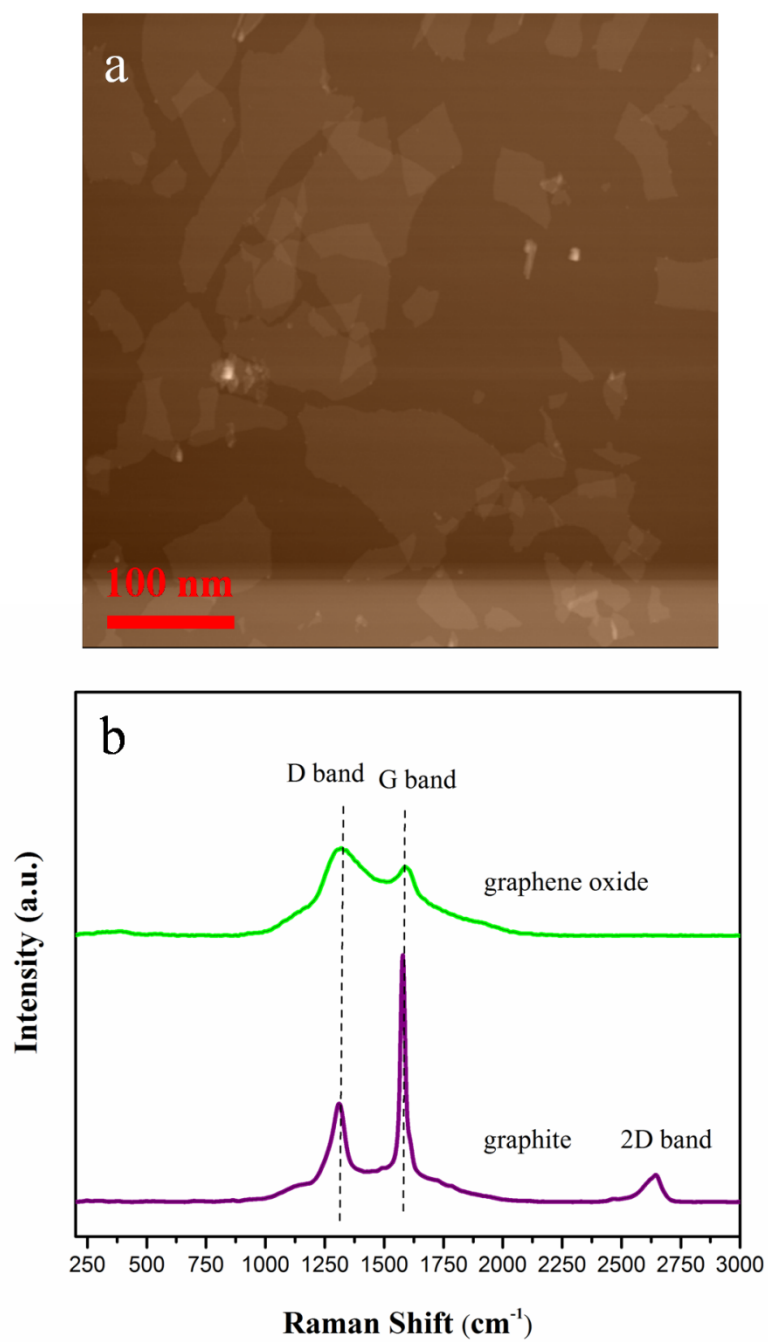

**Figure S6** (a) AFM image of graphene oxide sheets and (b) Raman spectra of graphitic materials.
